# Supplementary material for: A time-resolved molecular map of the macrophage response to VSV infection
Source: PubMed Central journal article supplement — NPJ Syst Biol Appl. 2016 Oct 27;2:16027–. doi: 10.1038/npjsba.2016.27 (PMC5516859; doi:10.1038/npjsba.2016.27), 2016-10-27

# Supplementary Figure S5

A)

MAVS\_MOUSE TSSVPS-----PRLVPVKIMSSKLPKSSKSTAAMTSTVLINTAPSKLPSSNSVYACTV 336  
 MAVS\_RAT TSSVPS-----IKPVPVNTMSSKLPISKSTAATPSTVPTNIAPSKLPINSVYTGIV 339  
 MAVS\_HUMAN TITLMPVNTVALKVPANPASVSTVPSKLPITSSKPPGAVPSNALTNPAPSKLPINSTTRAGMV 359  
 \*: :\* . . . \*: . \*\*\*\*\* \*: \* . . . \* . \* . . \*\* \*\*\*\*\* \*\* . : \* \*

B)

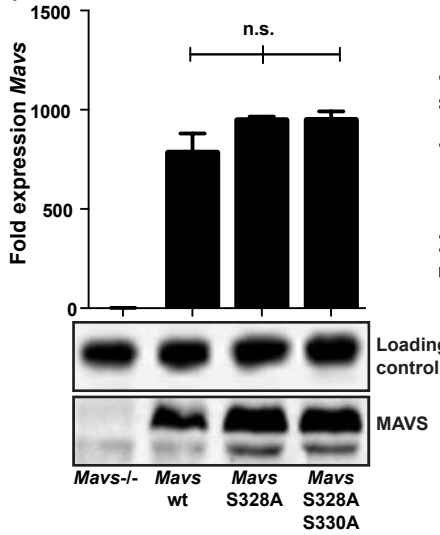

C)

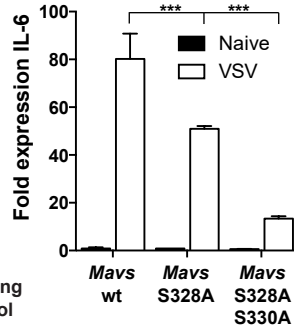

D)

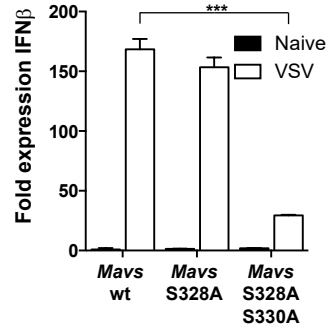

E)

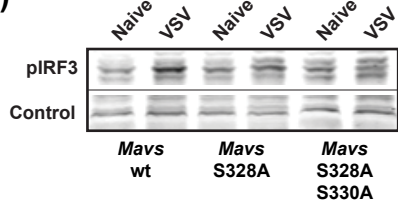

F)

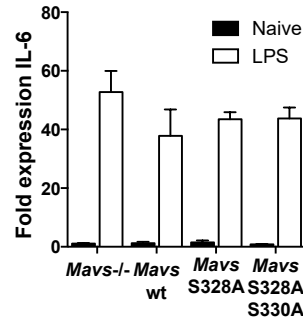

G)

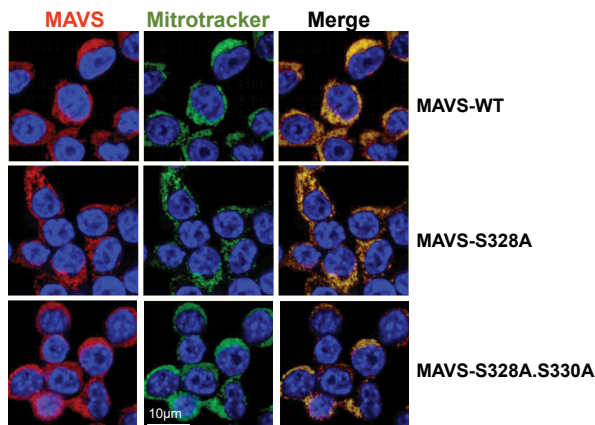

Supplement: npjsba201627-s8.pdf [file npjsba201627-s8.pdf]
