# Supplementary figures and images for: A time-resolved molecular map of the macrophage response to VSV infection
Source: PubMed Central journal article supplement — NPJ Syst Biol Appl. 2016 Oct 27;2:16027–. doi: 10.1038/npjsba.2016.27 (PMC5516859; doi:10.1038/npjsba.2016.27), 2016-10-27

# Supplementary Figure S1

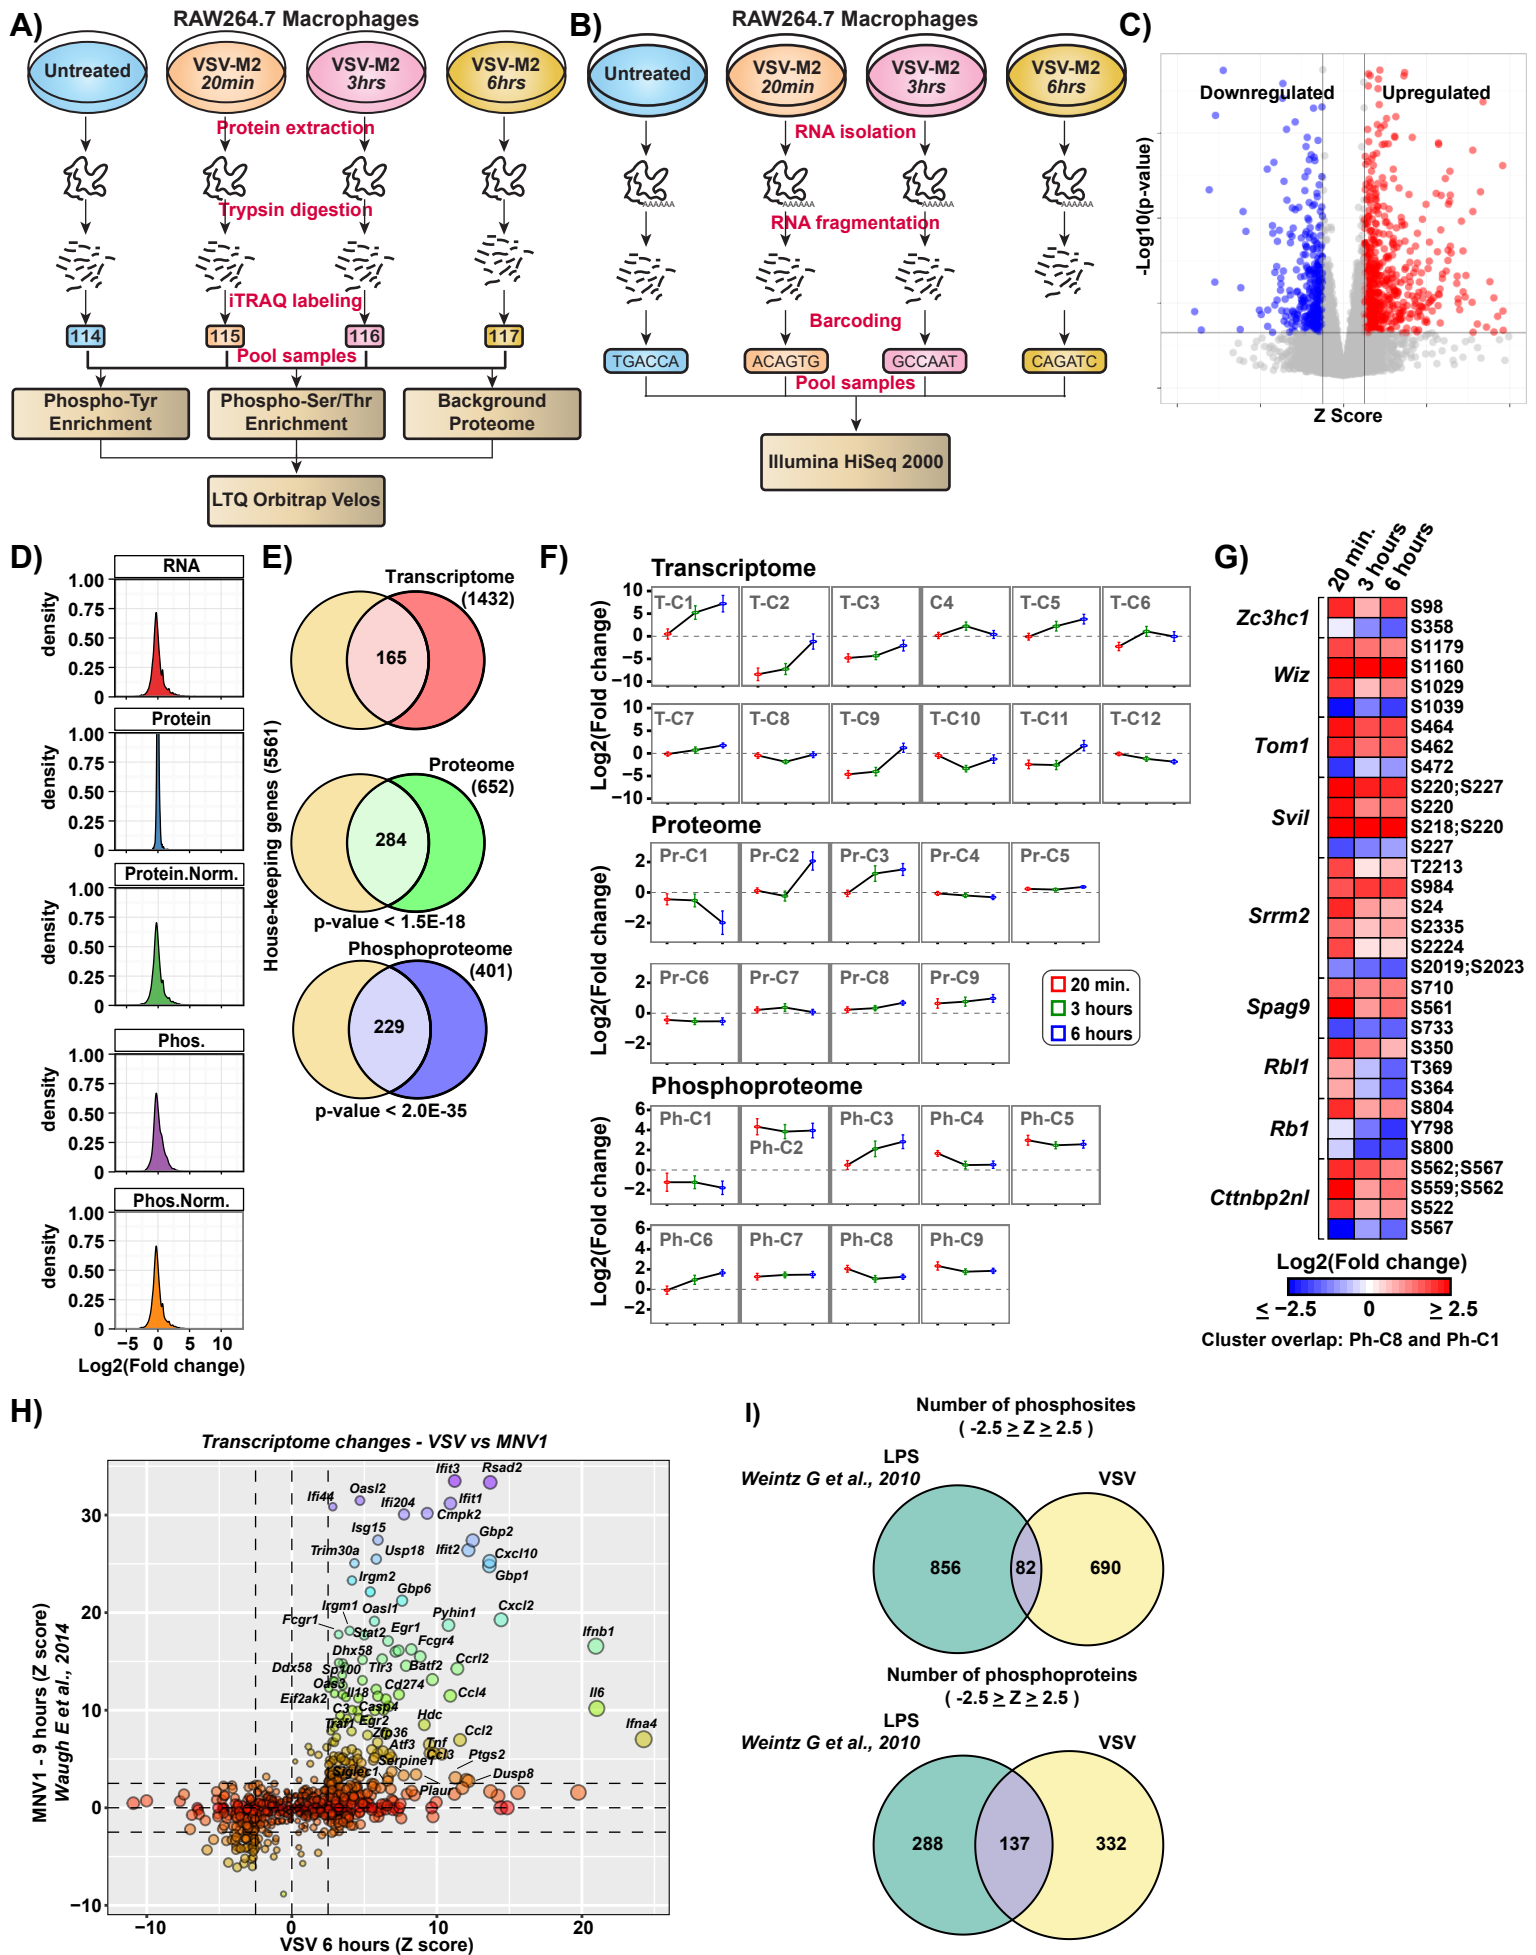

Supplement: npjsba201627-s4.pdf [file npjsba201627-s4.pdf]

# Supplementary Figure S4

A)

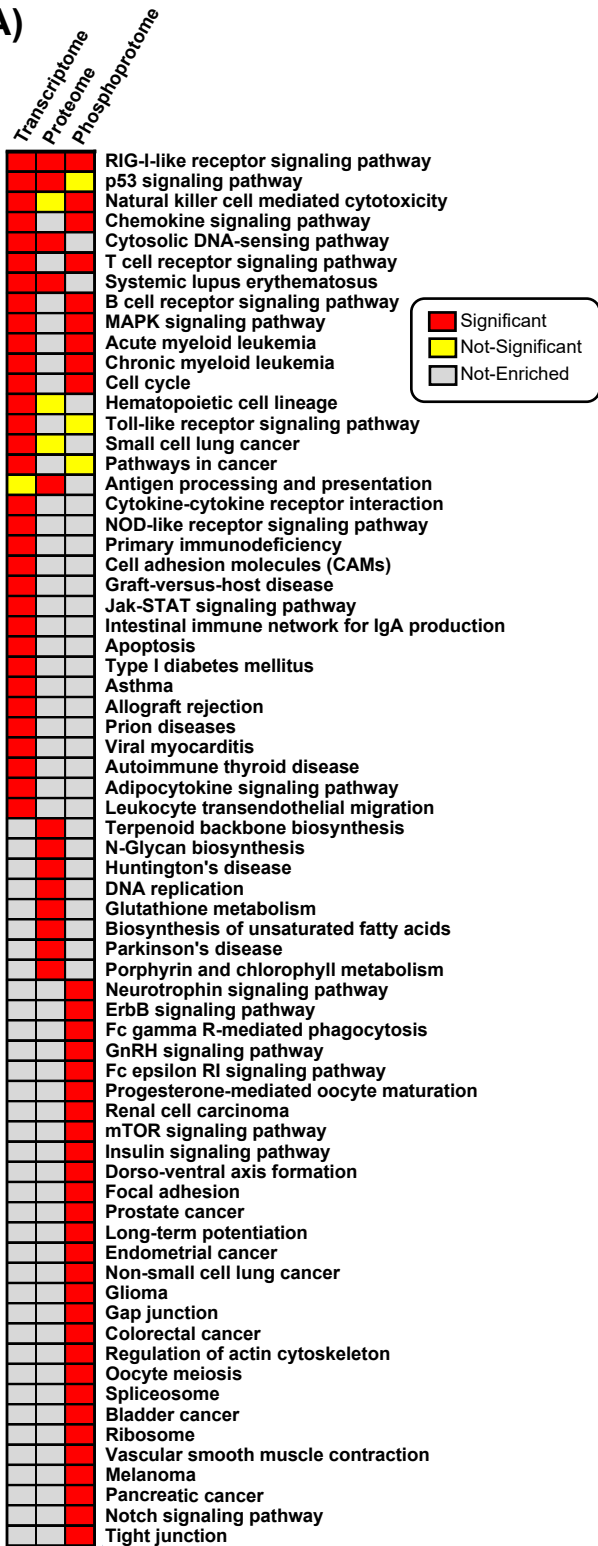

Supplement: npjsba201627-s7.pdf [file npjsba201627-s7.pdf]
